# Supplementary material
Source: PubMed Central journal article supplement (PMC4029776)
Supplement: bi500401k_si_001.pdf [file bi500401k_si_001.pdf]

## **SUPPORTING INFORMATION**

### **Transiently produced hypochlorite is responsible for the irreversible inhibition of chlorite dismutase**

**Stefan Hofbauer<sup>1</sup>, Clemens Gruber<sup>1</sup>, Katharina F. Pirker<sup>1</sup>, Axel Sündermann<sup>2</sup>, Irene Schaffner<sup>1</sup>, Christa Jakopitsch<sup>1</sup>, Chris Oostenbrink<sup>2</sup>, Paul G. Furtmüller<sup>1</sup>, Christian Obinger<sup>1\*</sup>**

<sup>1</sup>Department of Chemistry, Division of Biochemistry, VIBT – Vienna Institute of BioTechnology, BOKU – University of Natural Resources and Life Sciences, A-1190 Vienna, Austria

<sup>2</sup>Department of Material Sciences and Process Engineering, Institute of Molecular Modeling and Simulation, BOKU – University of Natural Resources and Life Sciences, A-1190 Vienna, Austria

**Supplemental Figure 1.** pH-dependence of chlorite conversion by NdCld mutants. (A) Initial rates of production of dioxygen from 40  $\mu\text{M}$  chlorite mediated by 200 nM NdCld mutant R173A at different pH-values (50 mM citrate phosphate buffer pH 4 - 7; 50 mM phosphate buffer pH 7 - 8; 50 mM Tris/HCl buffer, pH 8 - 9). (B) Total amount of produced dioxygen in the range of pH 4 - 9. Conditions in (C), where 200 nM NdCld mutant R173K was used resembled conditions from (A); and conditions in (D) were equal to conditions in (B) using 200 nM NdCld mutant R173K.

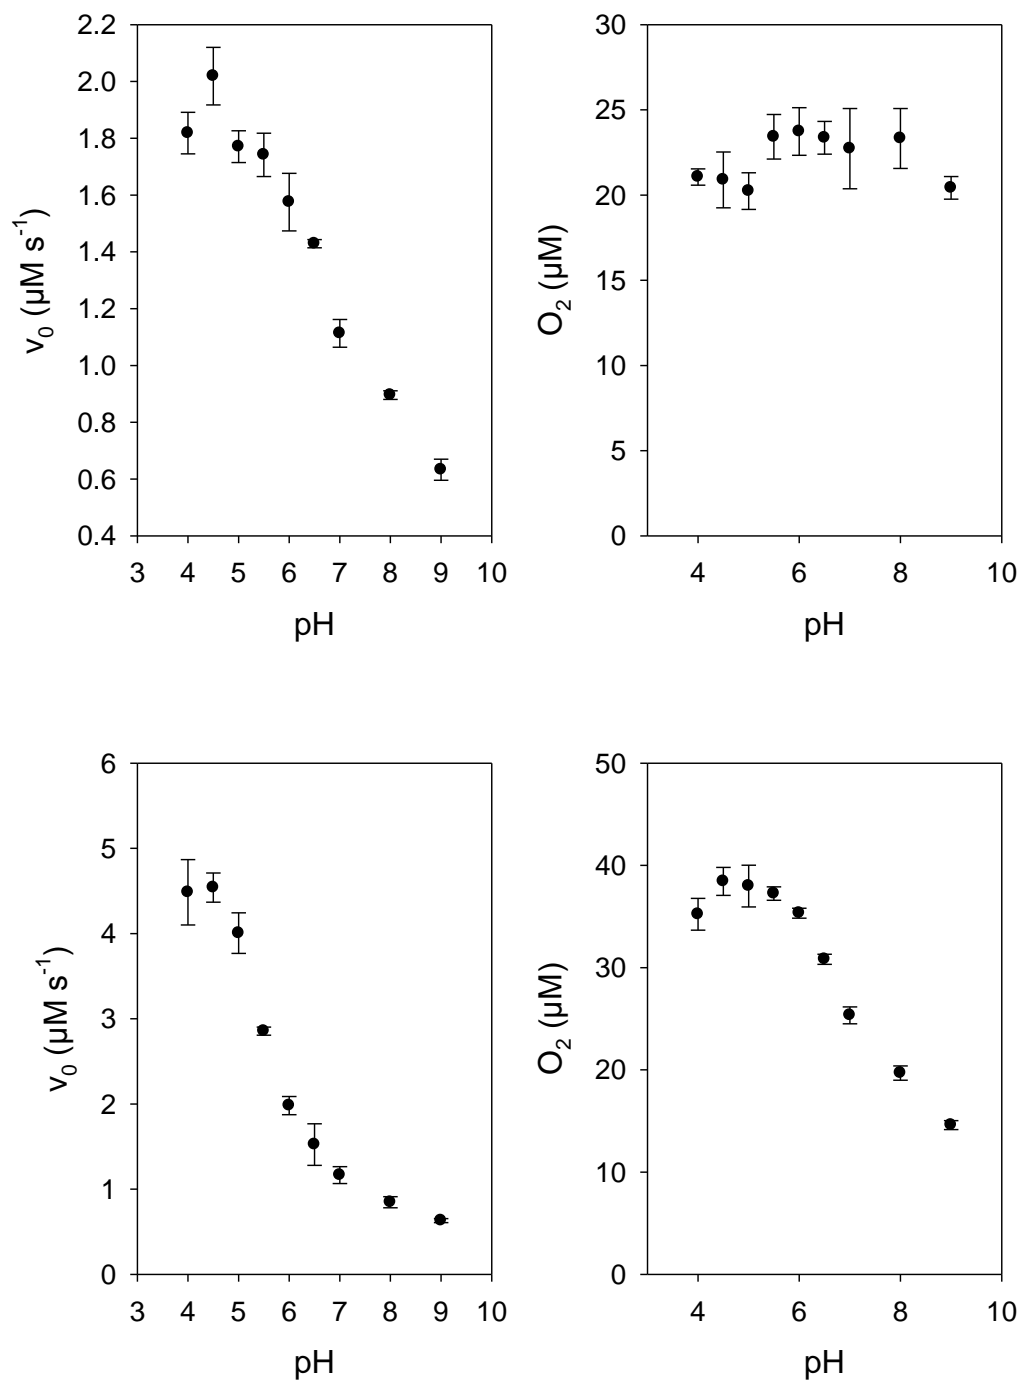

**Supplemental Figure 2. Calibration curve of APF fluorescence for hypochlorite.** (A) fluorescence spectra of 10  $\mu\text{M}$  APF between 495 and 600 nm ( $\lambda_{\text{excitation}} = 488$  nm) after reactions with with 0  $\mu\text{M}$  to 20  $\mu\text{M}$  hypochlorite; 50 mM phosphate buffer pH 7.0. (B) Plot of fluorescence intensity *versus* hypochlorite concentration, showing a sigmoidal fit (logistic, 4 parameter). (C) Fluorescence spectra of 10  $\mu\text{M}$  APF between 495 and 600 nm ( $\lambda_{\text{excitation}} = 488$  nm) after reactions with 100 nM NdCl<sub>3</sub> wild-type with 0  $\mu\text{M}$  (black), 100  $\mu\text{M}$  (red), 200  $\mu\text{M}$  (green), 300  $\mu\text{M}$  (yellow), 400  $\mu\text{M}$  (blue), 500  $\mu\text{M}$  (magenta), and 750  $\mu\text{M}$  (cyan) chlorite; 50 mM phosphate buffer pH 7.0. (D) Plot of trapped HOCl concentration versus chlorite concentration, showing a linear fit between 100 and 500  $\mu\text{M}$  chlorite.

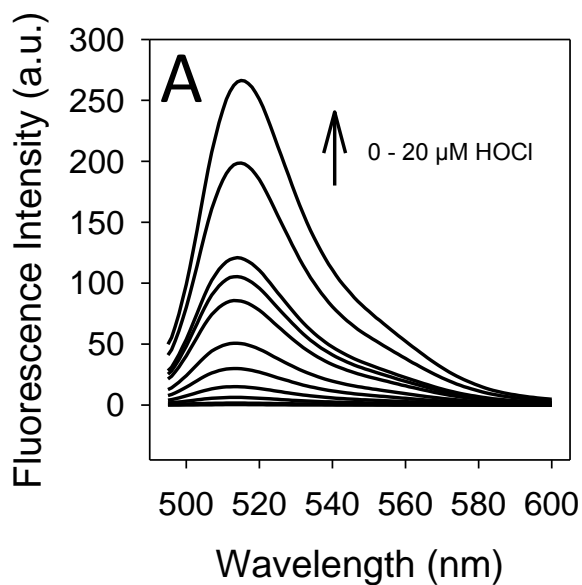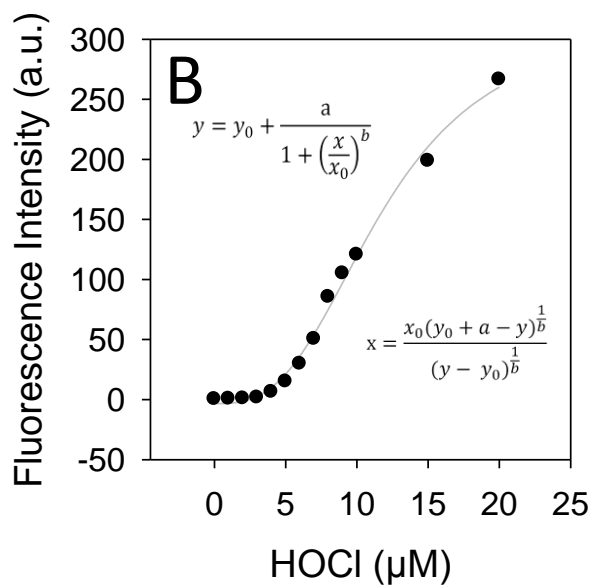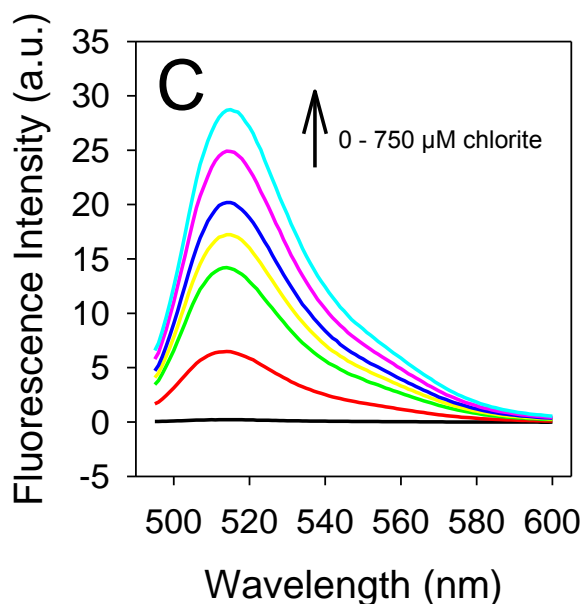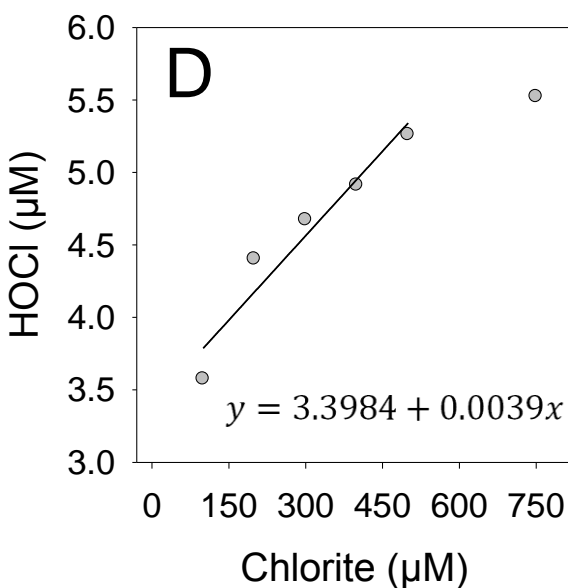

**Supplemental Figure 3.** (A) Electron Paramagnetic Resonance spectra of 30  $\mu\text{M}$  NdCl<sub>3</sub> in 50 mM MES buffer, pH 5.5., in absence (black lines) and presence (red lines) of 17.5 mM methionine, after reaction with 0 mM (bottom) to 100 mM (top) chlorite. (B) Ferric high spin signal intensity of chlorite treated samples in absence (black bars) and in presence (red bars) of methionine.

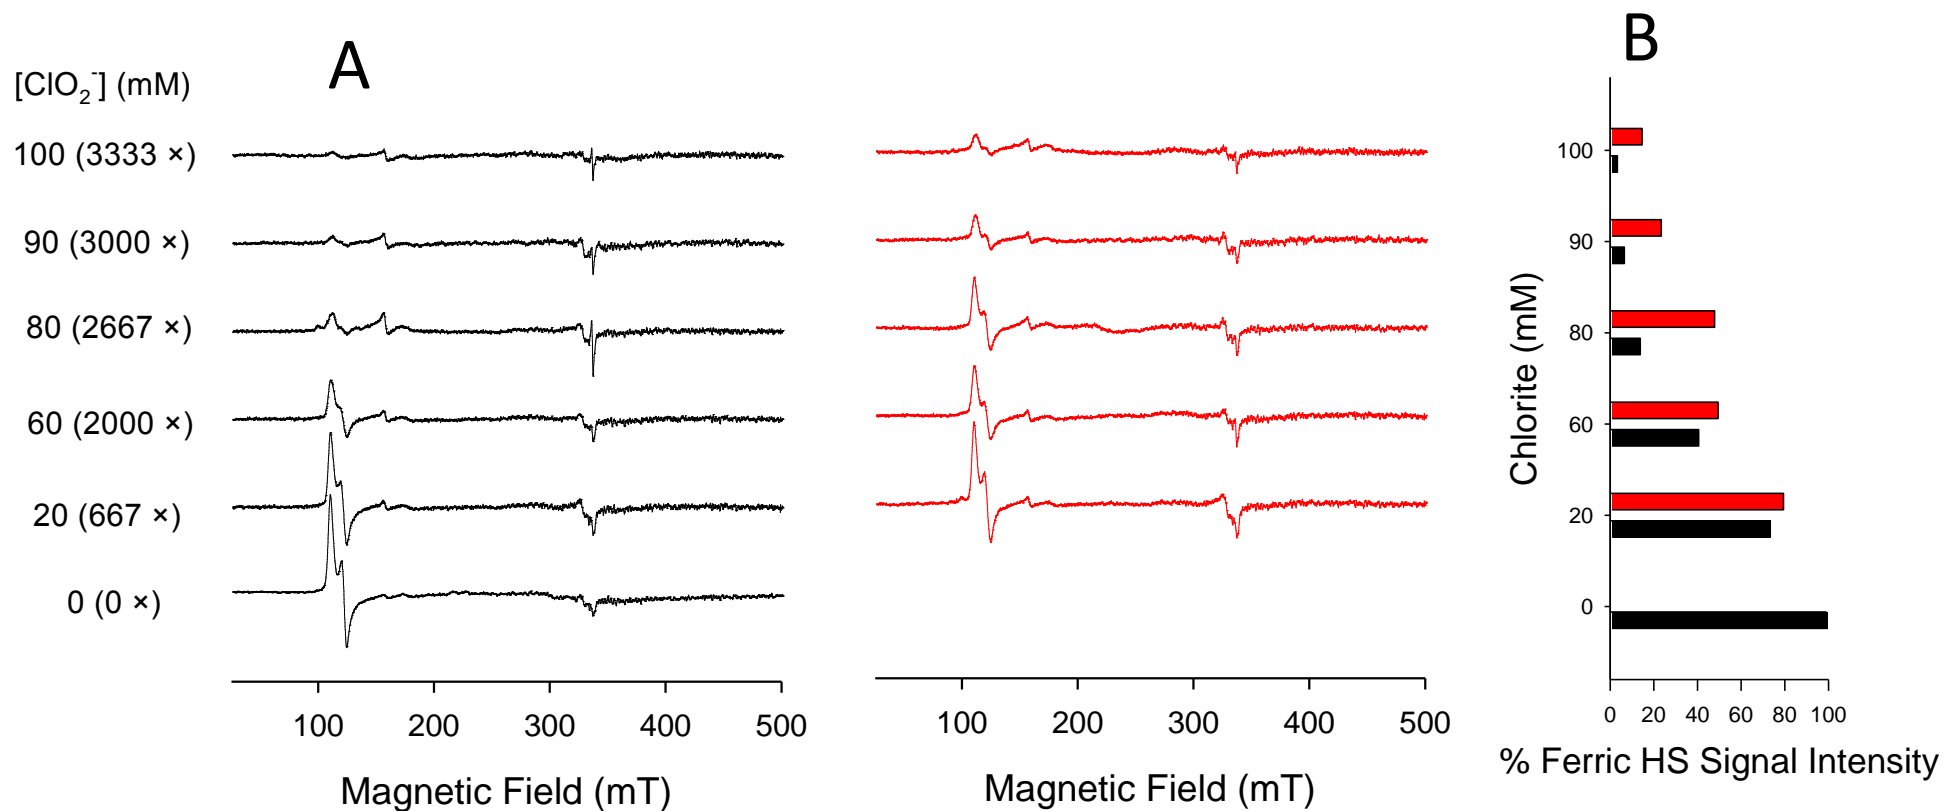

**Supplemental Figure 4. Influence of hypochlorite to the architecture of the heme-iron of chlorite dismutase from “*Candidatus Nitrospira defluvii*”.** EPR spectra of 30  $\mu\text{M}$  wild-type NdCld treated with (bottom to top) 0 mM, 1 mM, 16 mM, and 23 mM of hypochlorite

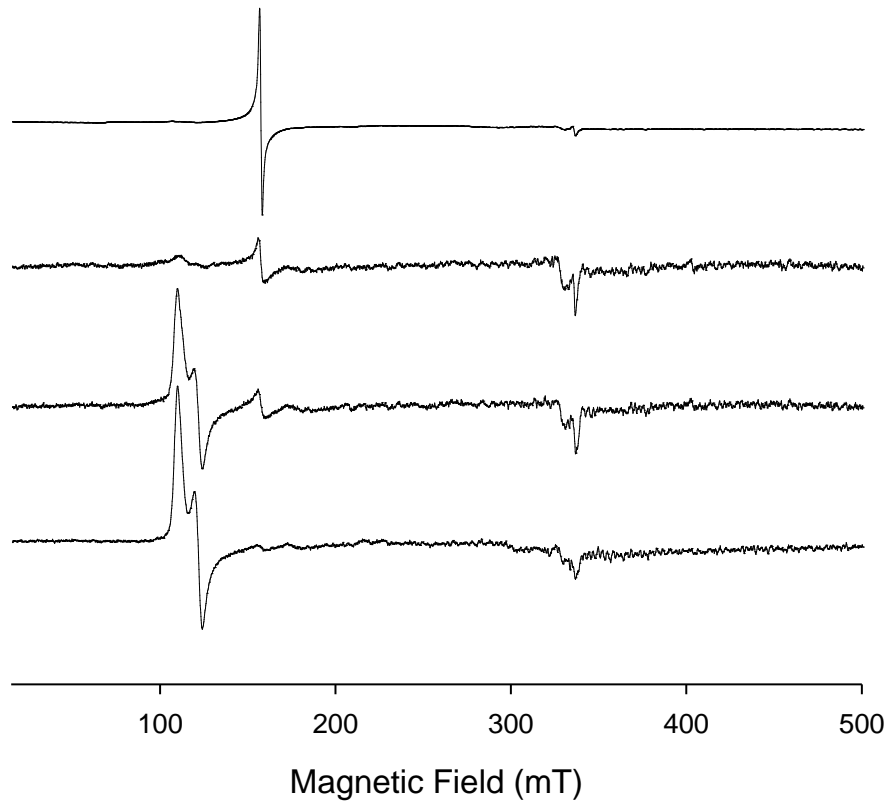

**Supplemental Figure 5. The effect of methionine on the interconversion of redox intermediates and heme bleaching.** (A) Spectral changes, when 1  $\mu\text{M}$  of wild-type NdCld was mixed with 1 mM of chlorite at pH 5.5 (50 mM citrate-phosphate buffer) in the conventional stopped-flow modus. Spectra were taken at 3 ms (black spectrum), 74 ms, 403 ms, 755 ms, 1352 ms, 2367 ms, 4090 ms, 7018 ms, and 11990 ms, respectively. The final spectrum (20000 ms) is depicted in red. Inset shows enlargement of Soret region. (B) Same reaction as in (A) but in the presence of 5 mM methionine. (C) Same reaction as in (A) but at pH 7.0 (50 mM phosphate buffer), (D) same reaction as (C) but in presence of 5 mM methionine.

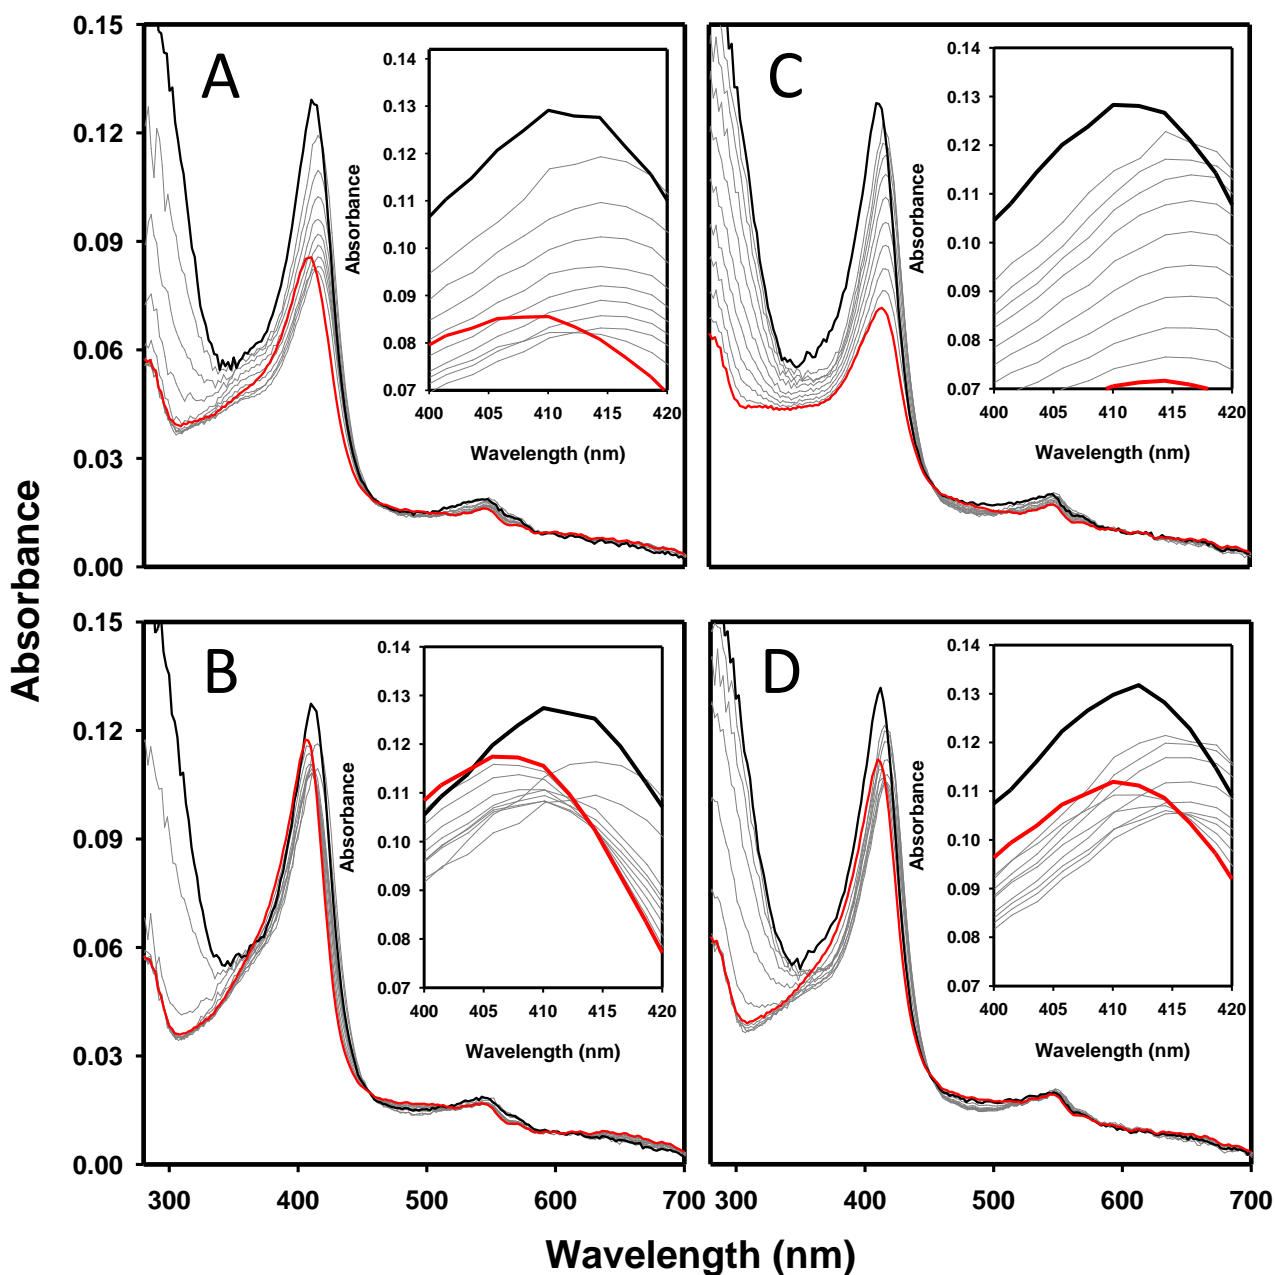

**Supplemental Table 1.** EPR simulation parameters from individual high spin and low spin forms of NdCl<sub>3</sub> at pH 5.5 and pH 7.0, eventually with chlorite and methionine (HS – high spin, LS – low spin, R – rhombicity, I – relative intensity, E/D – rhombic to axial contribution, TI – total intensity with respect to untreated protein).

|                                                                       | HS LS<br>compounds* | $g_x^{eff}$ | $g_x$ | $g_y^{eff}$ | $g_y$ | $g_z^{eff}$ | $g_z$ | E/D | R (%) | I (%) | TI (%) |
|-----------------------------------------------------------------------|---------------------|-------------|-------|-------------|-------|-------------|-------|-----|-------|-------|--------|
| NdCl <sub>3</sub> pH 5.5                                              | HS1                 | 5.500       | 6.175 | 1.990       |       | 0.014       | 4.2   | 80  | 100   |       |        |
|                                                                       | HS2                 | 5.950       | 5.950 | 1.995       |       |             |       | 20  |       |       |        |
| NdCl <sub>3</sub> pH 5.5<br>+ 17.5 mM methionine                      | HS1                 | 5.500       | 6.175 | 1.990       |       | 0.014       | 4.2   | 49  | 104   |       |        |
|                                                                       | HS2                 | 5.950       | 5.950 | 1.995       |       |             |       | 26  |       |       |        |
|                                                                       | LS1                 | 2.980       | 2.250 | 1.875       |       |             |       | 13  |       |       |        |
|                                                                       | LS2                 | 3.150       | 2.250 | 1.800       |       |             |       | 13  |       |       |        |
| NdCl <sub>3</sub> pH 5.5<br>+ 100 mM chlorite                         | HS1                 | 5.625       | 6.225 | 1.990       |       | 0.013       | 3.7   | 43  | 14    |       |        |
|                                                                       | HS2                 | 5.950       | 5.950 | 1.995       |       |             |       | 57  |       |       |        |
| NdCl <sub>3</sub> pH 5.5<br>+ 100 mM chlorite<br>+ 17.5 mM methionine | HS1                 | 5.500       | 6.175 | 1.990       |       | 0.014       | 4.2   | 50  | 36    |       |        |
|                                                                       | HS2                 | 5.950       | 5.950 | 1.995       |       |             |       | 28  |       |       |        |
|                                                                       | HS3                 | 5.250       | 6.375 | 1.975       |       | 0.025       | 7.0   | 22  |       |       |        |
| NdCl <sub>3</sub> pH 7.0                                              | HS1                 | 5.500       | 6.175 | 1.990       |       | 0.014       | 4.2   | 49  | 100   |       |        |
|                                                                       | HS2                 | 5.950       | 5.950 | 1.995       |       |             |       | 19  |       |       |        |
|                                                                       | LS1                 | 2.980       | 2.250 | 1.875       |       |             |       | 15  |       |       |        |
|                                                                       | LS2                 | 3.150       | 2.250 | 1.800       |       |             |       | 16  |       |       |        |
| NdCl <sub>3</sub> pH 7.0<br>+ 17.5 mM methionine                      | HS1                 | 5.500       | 6.175 | 1.990       |       | 0.014       | 4.2   | 32  | 83    |       |        |
|                                                                       | HS2                 | 5.950       | 5.950 | 1.995       |       |             |       | 28  |       |       |        |
|                                                                       | HS3                 | 5.250       | 6.375 | 1.975       |       | 0.025       | 7.0   | 14  |       |       |        |
|                                                                       | LS1                 | 2.980       | 2.250 | 1.875       |       |             |       | 13  |       |       |        |
|                                                                       | LS2                 | 3.150       | 2.250 | 1.800       |       |             |       | 14  |       |       |        |
| NdCl <sub>3</sub> pH 7.0<br>+ 100 mM chlorite                         | HS1                 | 5.500       | 6.175 | 1.990       |       | 0.014       | 4.2   | 18  | 11    |       |        |
|                                                                       | HS2                 | 5.950       | 5.950 | 1.995       |       |             |       | 64  |       |       |        |
|                                                                       | HS3                 | 5.450       | 6.225 | 1.990       |       | 0.017       | 4.8   | 18  |       |       |        |
| NdCl <sub>3</sub> pH 7.0<br>+ 100 mM chlorite<br>+ 17.5 mM methionine | HS1                 | 5.500       | 6.175 | 1.990       |       | 0.014       | 4.2   | 41  | 42    |       |        |
|                                                                       | HS2                 | 5.950       | 5.950 | 1.995       |       |             |       | 23  |       |       |        |
|                                                                       | HS3                 | 5.250       | 6.375 | 1.975       |       | 0.025       | 7.0   | 36  |       |       |        |

\* minimum number of high-spin and low-spin compounds used for simulation
